# Supplementary material
Source: Elsevier journal article supplement (https://www.sciencedirect.com/science/article/pii/S0033833821001545)
Supplement: mmc1 [file S0033833821001545:mmc1.docx]

**Anexo 1** Cuestionario de prevalencia del síndrome de desgaste en radiólogos españoles

A. Valoración cualitativa del grado del síndrome de desgaste profesional a través del Maslach Burnout Inventory Human Services Survey (MBI-HSS)

B. Condiciones sociodemográficas y laborales:

1. Edad

2. Genero

3. Comunidad autónoma

4. Hospital (primario, secundario, terciario) o centro de especialidades

5. Subespecialidad dentro de la radiología

6. Se realiza o no docencia en el lugar de trabajo

7. Se realizan guardias (en caso afirmativo promedio guardias al mes)

8. Antigüedad de años de ejercicio como radiólogo:

a. 0-4 años

b. 5-9 años

c. 10-19 años

d. 20-29 años

e. >30 años

9. Deslizamiento de jornada laboral (en caso de necesidad se trabaja por la tarde)

10. Módulos extra

11. Trabajo extra en hospitales/clínicas privadas

12. Incentivos

13. Ingreso anual aproximadamente:

a. <25 000 €

b. 25 000-40 000 €

c. >40 000 €

14. En periodo de vacaciones se hace sustitución de personal

*Las siguientes 3 preguntas se realizaron solo a los encuestados que respondieron durante el periodo abril y agosto 2020 (durante la pandemia).*

15. Estado civil

16. Número de hijos

17. Tipo contrato laboral

C. Percepción/opinión de los radiólogos sobre las posibles causas de estrés y factores que podrían mejorar su situación:

1. Posibles causas de estrés:

a. El trabajo demasiado caótico me agota

b. Falta de control sobre el trabajo

c. El ordenador/programa se cuelga fácilmente

d. Las guardias de urgencias

e. ¿Está conforme con su salario?

f. El trabajo no me permite pasar suficiente tiempo con mi familia

g. Gran número de estudios asignados por día

h. El trato con otras especialidades

i. Los compañeros no aprecian mi trabajo adecuadamente

j. Mi trabajo no cumple con mis expectativas

k. Me siento aislado/a en el trabajo

l. El trabajo me aburre

2. Opciones que mejorarían mi estado de ánimo:

a. Mejoras en la organización del servicio

b. Fomentar el trabajo en equipo

c. Aumentar el número de personas asignadas para cada una de las actividades

d. Establecer la actividad a realizar de cada profesional diariamente

e. Disminuir estudios asignados por profesional o aumentar el personal

f. Mejora de aptitudes de comunicación

g. Disminuir las horas de guardia

h. Me gustaría establecer una relación con mis compañeros fuera del trabajo

i. Cambiar de trabajo

| **Anexo 2** Características sociodemográficas del grupo de encuestados que cumplen los criterios de síndrome de desgaste profesional | | |
| --- | --- | --- |
|  |  | (n = 74) (%) a |
| Sexo | Varones/mujeres | 29 (39,2%)/45 (60,8%) |
| Edad años (media ± EE) |  | 39,8 ± 9,55 |
| Comunidad autónoma | | |
|  | C. Valenciana | 11 (14,9%) |
|  | Galicia | 2 (2,7%) |
|  | Cataluña | 10 (13,5%) |
|  | C. Madrid | 20 (27%) |
|  | Andalucía | 4 (5,4%) |
|  | Castilla y León | 6 (8,1%) |
|  | Región de Murcia | 7 (9,5%) |
|  | Otras | 14 (18,9%) |
| Centro de trabajo |  |  |
|  | Terciario | 32 (43,8%) |
|  | Secundario | 18 (24,7%) |
|  | Primario | 10 (13,7%) |
|  | Hospital privado | 12 (16,4%) |
|  | Centro de especialidades | 1 (1,4%) |
| Años trabajados |  |  |
|  | 0-4 años | 14 (19,4%) |
|  | 5-9 años | 18 (25%) |
|  | 10-19 años | 25 (34,8%) |
|  | 20-29 años | 13 (18%) |
|  | >30 años | 2 (2,8%) |
| Subespecialidad |  |  |
|  | Radiólogo general | 24 (32,4%) |
|  | Residente | 14 (18,9%) |
|  | Abdomen | 3 (4,1%) |
|  | Imagen de la mujer | 2 (2,7%) |
|  | Musculoesquelético | 8 (10,8%) |
|  | Intervencionismo | 8 (10,8%) |
|  | Infantil | 0 |
|  | Cabeza y cuello | 1 (1,4%) |
|  | Tórax/cardio | 2 (2,7%) |
|  | Urgencias | 6 (8,1%) |
|  | Neurorradiología | 4 (5,4%) |
|  | Oncología | 2 (2,7%) |
| Guardias |  |  |
|  | No | 11(15,1%) |
|  | Menos de 3 guardias | 19 (26%) |
|  | Entre 3 y 6 guardias | 33 (45,2%) |
|  | Más de 6 guardias | 10 (13,7%) |
| Sueldo |  |  |
|  | Menos de 25 000 | 16 (21,9%) |
|  | Entre 25 000 y 45 000 | 13 (17,8%) |
|  | Más de 45 000 | 44 (60,3%) |
| Docencia |  |  |
|  | Sí/No | 52 (70,3%)/22 (29,7%) |

aPorcentaje del número total de respuestas válidas para cada variable.
